# Supplementary material
Source: PubMed Central journal article supplement (PMC6974572)

# Supplemental Figure 1

## A

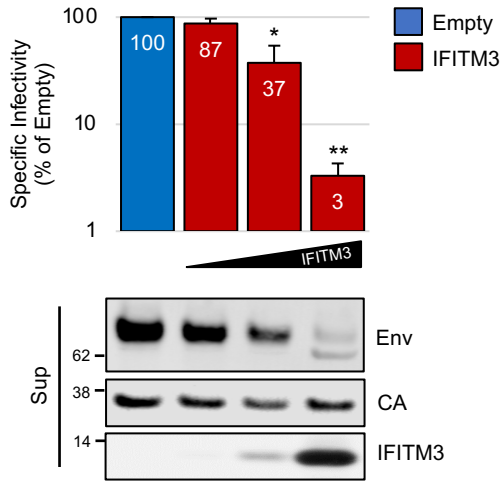

## B

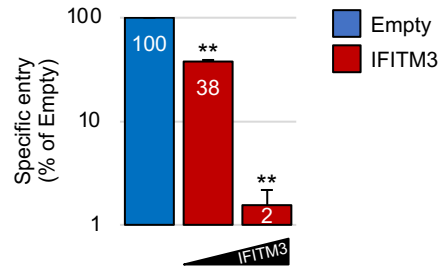

## C

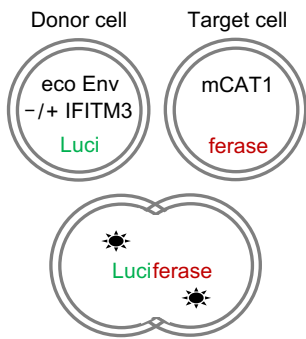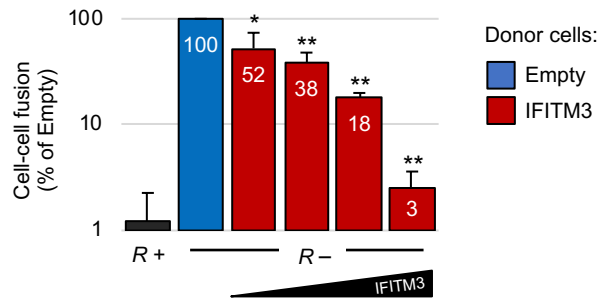

## D

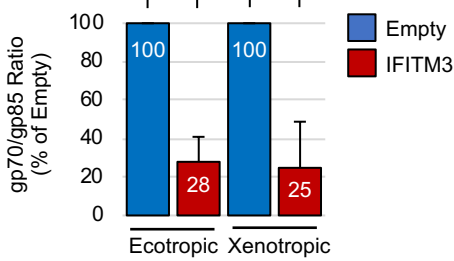

## F

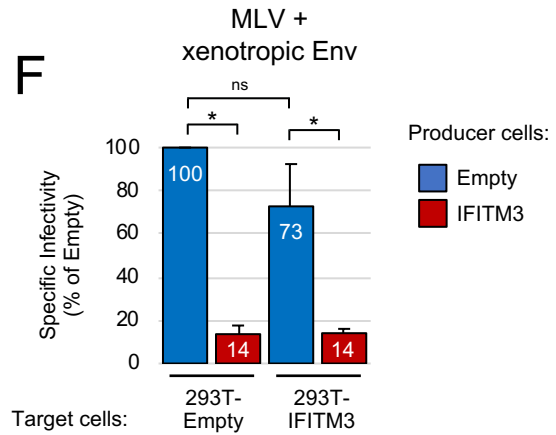

## E

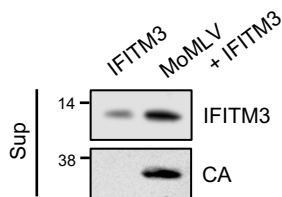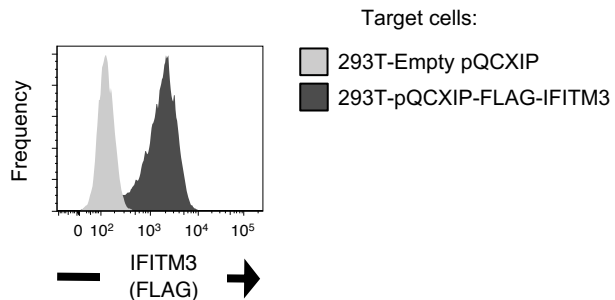

Supplement: mBio.03088-19-sf001.pdf [file mBio.03088-19-sf001.pdf]

Supplemental Figure 2

A

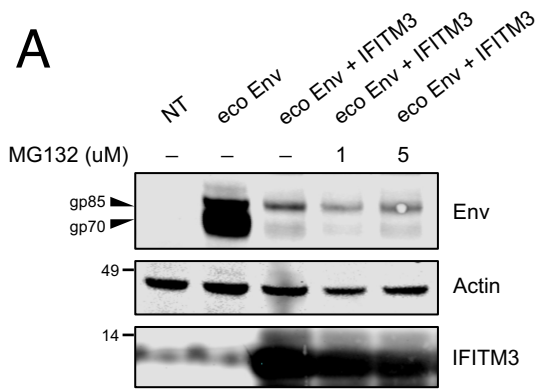

B

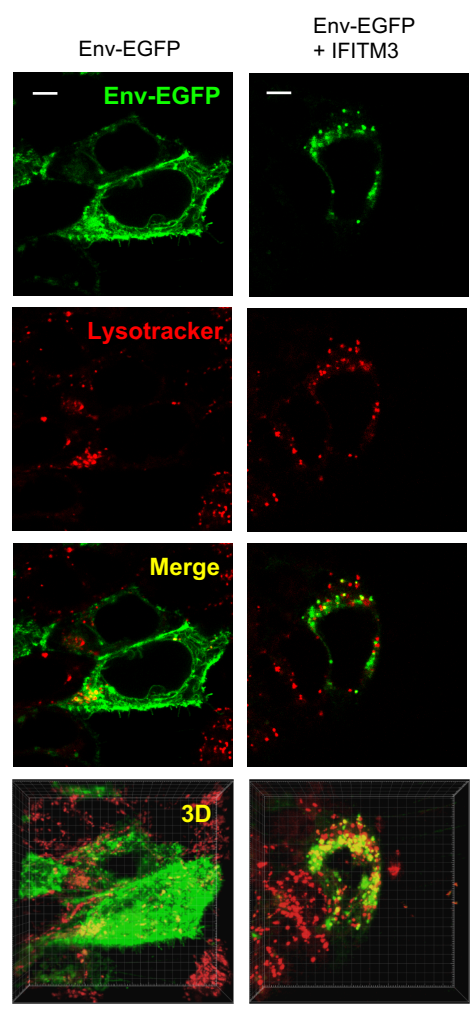

Supplement: mBio.03088-19-sf002.pdf [file mBio.03088-19-sf002.pdf]

Supplemental Figure 3

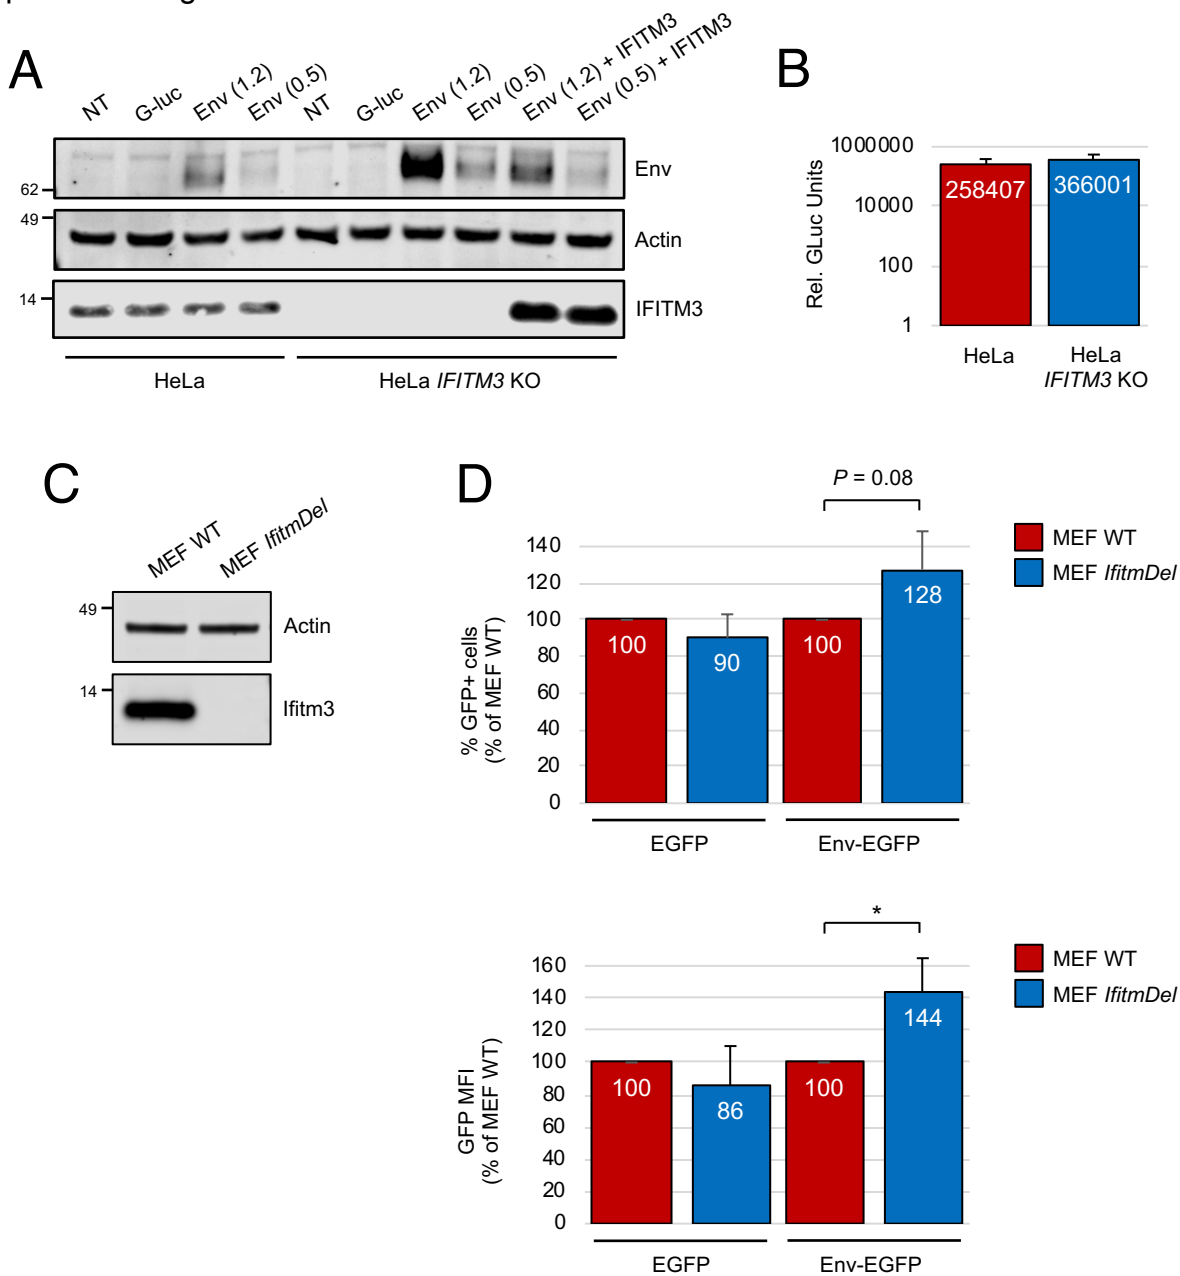

Supplement: mBio.03088-19-sf003.pdf [file mBio.03088-19-sf003.pdf]

Supplemental Figure 4

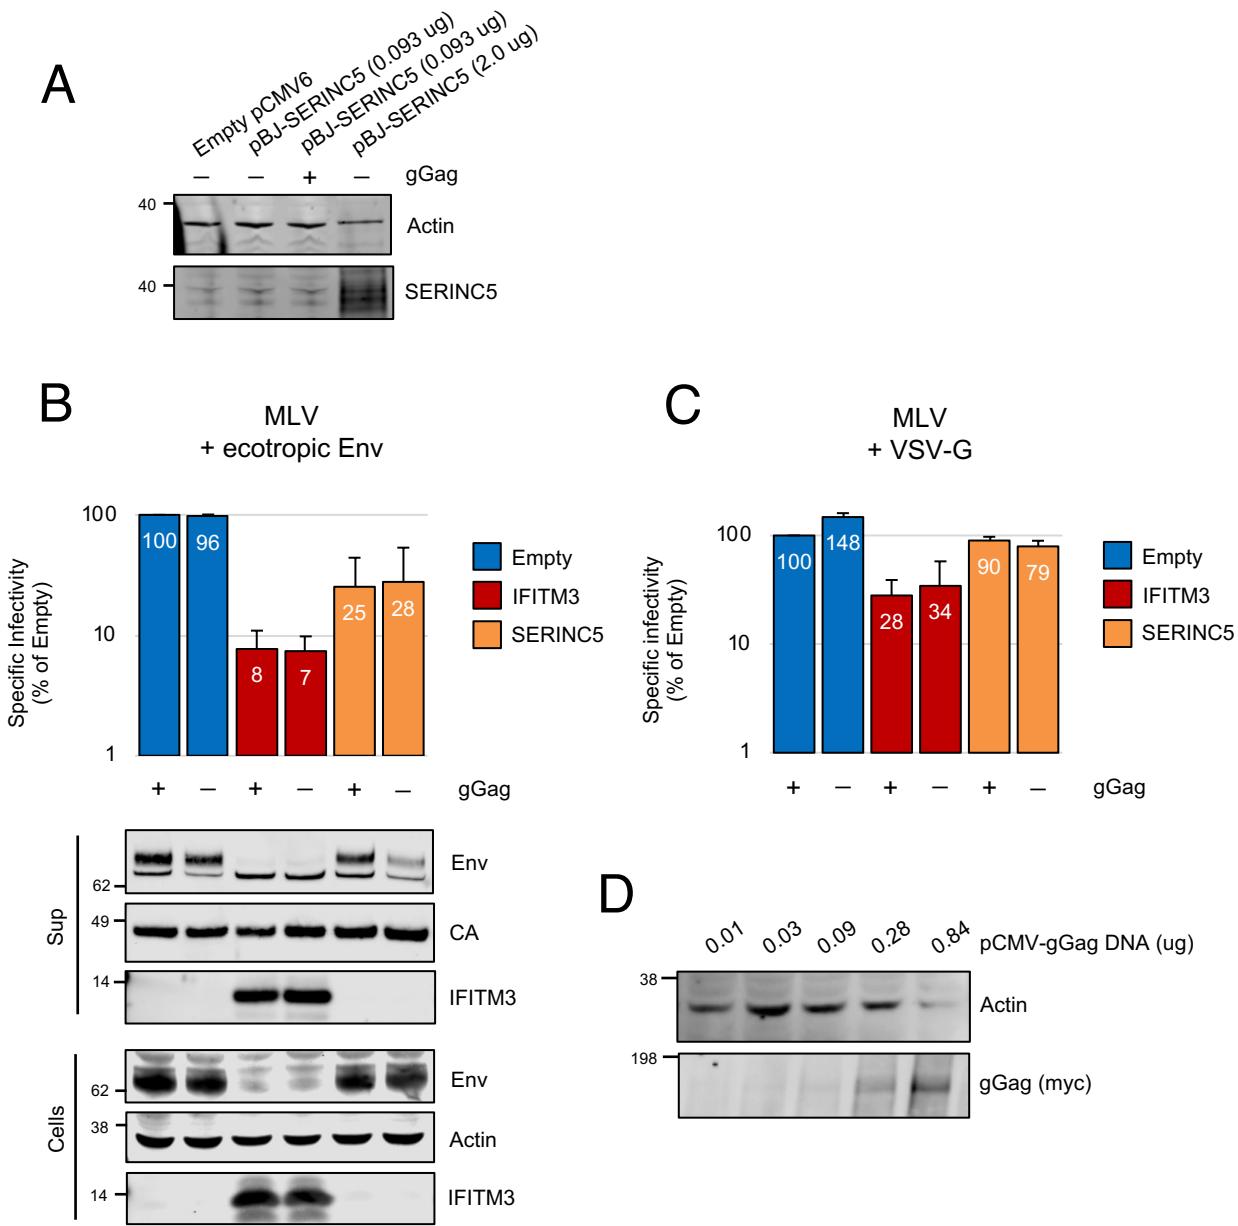

Supplement: mBio.03088-19-sf004.pdf [file mBio.03088-19-sf004.pdf]
